# Supplementary material for: Kinetic fractionation of noble gases in the stratosphere over Japan
Source: Copernicus journal article supplement (doi:10.5194/egusphere-2025-2916), 2025-07-01
Supplement: Supplementary file [file egusphere-2025-2916-AC1-supplement.pdf]

## Author Responses to the Referee #1 Comments

Thank you very much for your significant and useful comments on the paper “Kinetic fractionation of noble gases in the stratosphere over Japan” by Sugawara et al. We have revised the manuscript, considering your comments and suggestions. Details of our revision are as follows. The line numbers denote those of the revised manuscript.

### Section 2.3:

*Mean age of air: this section was a little hard to follow and could be improved with more information related to the statements made in this paragraph. Below are examples of lines where more clarification would be very helpful:*

*Line 178-179: “certain relationship between the gravitational separation of the major atmospheric components and the mean age of stratospheric air”.*

*What the relationship is, is unknown to the reader, and should be stated clearly.*

We have deleted the sentences, “Previous studies have shown that there is a certain relationship between the gravitational separation of the major atmospheric components and the mean age of stratospheric air (Ishidoya et al., 2013; Sugawara et al., 2018; Belikov et al., 2019; Birner et al., 2020).”, and replaced as follows:

Lines 182-189:

“Previous studies have shown that the gravitational separation of the major atmospheric components strengthens with increasing altitude ( $\delta$  values decrease with increasing altitude), and the mean age of stratospheric air increases simultaneously. Therefore, it is known that the vertical distributions of  $\delta(^{29}\text{N}_2/^{28}\text{N}_2)$  and mean age of air show anti-correlations (Ishidoya et al., 2013; Sugawara et al., 2018). These correlations have also been reproduced by 3-dimensional model studies (Belikov et al., 2019; Birner et al., 2020). Furthermore, an anti-correlation in the interannual variations of the gravitational separation and the mean age of air has been observed in the northern mid-latitude mid-stratosphere (Ishidoya et al., 2013). This means that gravitational separation becomes stronger when the relevant stratospheric air becomes older.”

*Line 180-183: “We also measured the mole fractions of CO<sub>2</sub> and SF<sub>6</sub> in our stratospheric air samples.... Because this method of estimation has already been described in previous studies... only a brief description is presented here.”*

*It should be stated clearly why CO<sub>2</sub> and SF<sub>6</sub> are species specifically chosen to measure the*

*age of air. That information is currently not available here and may not be known to all.*

We have deleted the sentences, “We also measured the mole fractions of CO<sub>2</sub> and SF<sub>6</sub> in our stratospheric air samples. These mole fractions are often used to estimate the mean age of stratospheric air.”, and added new sentences as follows:

Line 189-193:

“The mean age of air has been estimated based on observation data of inert trace gases in the stratosphere. If an inert tracer shows a linear trend in troposphere, the time lag between tropospheric and stratospheric mole fractions is the mean age of air. The mole fractions of CO<sub>2</sub> and SF<sub>6</sub> have been widely used for this purpose, because both species are almost inert in the stratosphere and show monotonous increase trends in troposphere. Therefore, we measured the mole fractions of CO<sub>2</sub> and SF<sub>6</sub> in our stratospheric air samples and calculated the mean age of air as described below.”

*Lines 188-200: “The mean age was estimated.... ratio of moments to be 1.25years”*

*This section is mostly unclear to me, although my expertise in this is limited. Some clarifications would be helpful though. First, along with clarifying why CO<sub>2</sub> and SF<sub>6</sub> mole fractions are chosen specifically, clarifying what the convolution method is, would also be very helpful. Specifically, clarifying what the tropospheric reference curve and the hypothetical age spectrum represent physically/temporally.*

*Additionally, describing where the ratio of moments relationship comes from and its physical significance would be helpful for the reader. It seems important in this context. Also, why the 1.25years is the choice made here should be explained. The authors mention that this was reported in a previous study but, clarifying why they think that this is accurate to use, would be helpful.*

We have totally revised mean age section 2.3 and added more detailed sentences about age spectrum, convolution method, and ratio of moments as follows:

Lines 201-203:

“The convolution method is a method for determining the mean age by calculating the convolution of the age spectrum and a tropospheric reference curve and comparing it with the observed value.”

Lines 208-209:

“The age spectrum is defined as the statistical probability of individual transit times of different air parcels arrived at a certain place in stratosphere after air parcels intruded into the stratosphere through the tropical upper troposphere. The age spectrum naturally changes over time, but it was ignored here.”

Lines 212-219:

“This function is known to be the Green’s function of one-dimensional advective diffusion differential

equation (Hall and Plumb, 1994). This function will be calculated by assuming the spectral width ( $\Delta$ ) and mean age ( $\Gamma$ ). The mean age is determined by successively calculating the convolutions of equation (3) while varying the value of  $\Gamma$  and comparing  $x(\Gamma, t)$  with the observed mole fractions. However,  $\Delta$  is still unknown.  $\Delta$  represents the effect of mixing process in atmospheric transport, and it is expected that the larger the mean age, the greater the effect of mixing and the  $\Delta$  will be. Therefore,  $\Delta$  is assumed to be given by the relationship  $\Delta^2/\Gamma = \text{constant}$  (years). This value, called the ratio of moments, is suggested by Hall and Plumb (1994) from the results of a stratospheric AGCM. A ratio of moments of 0.7 years has been widely used in previous studies (e.g. Engel et al. 2002).”

Lines 221-223:

“Fritsch et al. (2020) have reported that the mean age calculated from a virtual tracer with a linear trend using a numerical model is in good agreement with observed values when the ratio of moments value of 1.25 is assumed.”

### Section 3.1:

*General suggestion on Figure 2: This figure is an important figure for this manuscript as it shows the measurement results of this study. The figure is hard to read and decipher both in print and on the computer. The legends are too small to read, and it would be more useful to use different color/bigger markers to show these findings. The mode result lines are also hard to distinguish in the midst of all the measurement results.*

*I would recommend improving the readability of this figure, as it reports the major findings of this study. Additionally, it would be useful to have a visual representation of the uncertainty in these measurements, either as errorbars in the figures or just as a legend that represents the uncertainty of the data.*

We have replaced Figures 2, 3, 4, and 13 to improve the readability. Error bars have been added to all the vertical profiles in Figures 2 and 3.

*Line 213-215: “relative to the values observed in the lowest layers of the balloon observations.... negligibly small”*

*Clarify why this would be the case.*

Our aircraft observations have reported that there is no significant vertical gradient of the isotopic and elemental ratios of atmospheric major compositions from the surface to the tropopause (Ishidoya et al., 2008a). We have added sentences about that point and relevant references.

Lines 242-250:

“Although there are very few observations of the isotopic and elemental ratios of atmospheric major components in the upper troposphere, aircraft observations have reported that there is no significant vertical gradient of  $\delta(^{29}\text{N}_2/^{28}\text{N}_2)$  and  $\delta(^{34}\text{O}_2/^{32}\text{O}_2)$  from the surface to near the tropopause (Ishidoya et al., 2008a). On the other hand, Bent (2014) observed  $\delta(^{40}\text{Ar}/^{28}\text{N}_2)$  in air samples obtained by the HIAPER Pole-to-Pole Observations (HIPPO) project and reported a large vertical gradient in troposphere. However, such vertical gradient could not be explained by a 1-D atmospheric diffusion model, and it was unclear whether it is either natural or artificial. As will be discussed later, our results of 2-D model also show very small differences between the surface and the upper troposphere. Because the air samples at the lowest layer were collected below the tropopause in our balloon observations, the differences of the isotopic and elemental ratios between the ground surface and tropopause should be negligibly small.”

*Line 216: “clearly apparent... decreased with increasing altitude”.*

*Although this statement is broadly true and the data shown in figures 2 & 3 clearly highlight that, the elemental and isotopic composition of all 3 noble gases in figures 2&3 highlight excursions around specific altitudes. This is also apparent in all the data. For Xe, its between 20-25 km, Kr 25-30km, and Ar 15-20km. This does not seem included in the first section of the results, although they seem quite consistent. It would be useful to also note these in the results, and including them in the ensuing discussions.*

As you pointed, we have added a paragraph of irregular variations in vertical distributions of isotopic and elemental ratios as follows:

Lines 271-279:

“As seen in Figure 2 and 3, there are irregular fluctuations of the isotopic and elemental ratios in the vertical distributions and some of them occur synchronously within the same gas species. Ar isotopic ratios,  $\delta(^{40}\text{Ar}/^{36}\text{Ar})$ ,  $\delta(^{40}\text{Ar}/^{38}\text{Ar})$  and  $\delta(^{38}\text{Ar}/^{36}\text{Ar})$  observed in 2007 showed irregularly low values at altitude of 21 km. Kr isotopic ratios observed also showed similar variations at altitude of 26 km in 2007. Xe isotopic ratios below 21 km also showed similar variations, although their statistical significance is low. Unfortunately, the cause of these irregular variations is not clear at present. Because the irregular variations are not common to all gas species, it is likely that there were factors that had different effects on the gas species. The causes are not necessarily natural, and the possibility of small fractionations during sample air pretreatments cannot be ruled out. This issue, along with irregular variations in the isotopic and elemental ratios of the atmospheric major components, remains to be solved in the future.”

*Line 228: “The fluctuations of the Xe isotopic ratios were irregular and larger than those of the Ar*

*and Kr isotopic ratios”*

*Why?*

We have replaced Fig. 2 and 3 as described above. This shows that the error bars in the Xe isotopic ratios are larger than the vertical variations. Taking these into consideration, the descriptions of Xe isotope ratios have been changed as follows:

Lines 261-265

We have deleted following sentences:

“The isotopic ratios of Xe— $\delta(^{132}\text{Xe}/^{129}\text{Xe})$ ,  $\delta(^{136}\text{Xe}/^{129}\text{Xe})$ , and  $\delta(^{136}\text{Xe}/^{132}\text{Xe})$ —depended on mass number differences in a similar way. The fluctuations of the Xe isotopic ratios were irregular and larger than those of the Ar and Kr isotopic ratios.”,

and replaced with,

“Because the uncertainties in the analysis of Xe isotopic ratios — $\delta(^{132}\text{Xe}/^{129}\text{Xe})$ ,  $\delta(^{136}\text{Xe}/^{129}\text{Xe})$ , and  $\delta(^{136}\text{Xe}/^{132}\text{Xe})$ — were much larger compared to their vertical changes (Fig. 2c), their vertical gradients were not very significant. However, the larger the mass number difference, the larger the decreasing with altitude, and a mass-dependent relationship similar to that observed for Ar and Kr isotopic ratios was barely observed.”.

### Section 3.2:

*I thought this section is really well written and clear, and easy to understand and follow. Lines 379-385 particularly do a good job of summarizing simply the key findings of this section.*

It's an honor to hear that from you.

### Section 3.4:

*Lines 505-507: “ if Brewer Dobson circulation strengthened over time... reduce the mean age of stratospheric air.”*

*Does this change refer to the BDC as a whole? If my understanding is correct, there is shallow arm of the BDC that causes mass exchange between the stratosphere and troposphere across the 380 K isentrope, and a deeper arm of the BDC that exchanges mass with greater altitudes of the atmosphere.*

*Does the model result distinguish between these? Would a difference between this matter? Presumably if only the shallow branch changed, it would have a different magnitude of impact on the troposphere than if the deeper branch changed? Would it be possible to disentangle this information from the model results? There may be other existing 3-D modeled results (for e.g.*

<https://link.springer.com/article/10.1007/s00382-006-0162-4> ) that could shed more insights on this. This would be relevant and helpful information to have I believe.

We completely agree with your comment. Ideally, we should have calculated the changes in the shallow and deep branches of BDC separately, but we simplified the scenario as the first approach to noble gases. We believe that the difference between the shallow and deep branches is a topic for future study. We have added a description of this.

Lines 585-591:

“Recent studies have shown that the shallow and deep branches of the BDC show different trends, and it is important to distinguish between them. Indeed, reanalysis data and 3-D model results have reported that the mean ages of air in the shallow and deep branches change differently (e.g. Garny et al., 2024). However, it is difficult to fully discuss the differences between the shallow and deep branches of the BDC using a 2-D model, this study simply examined the sensitivities of noble gas fractionations at the ground surface to the change in entire stratosphere as a first approach. We believe that the differences of changes between the shallow and deep branches of the BDC will be a future challenge, such as modeling noble gases using a 3-D model.”

*Lines 511-520: It is unclear to me why the authors chose to only simulate increased mean age of air in this study, if it is unclear whether the mean mid-stratospheric age is increasing or decreasing. It would make more sense to simulate both increased and decreased mean ages, or explain more clearly why this choice was made.*

We have also conducted simulations of a decreasing mean age scenario (enhanced RMC scenario). The resulting trend is the opposite of that of the weakened RMC scenario, but the magnitude is almost the same. Similar results have been also shown in trends simulated for  $\delta(\text{Ar}/\text{N}_2)$  by Ishidoya et al. (2021). Since including figures of both results in this study would be somewhat cumbersome, we have omitted the figure and added relevant descriptions in the main text. The reason we chose the weakened RMC scenario here is that, although the trend of the mean age of air in mid-stratosphere is still inconclusive, observations have reported a weak positive trend (Engel et al., 2009), which has been confirmed very recently by observations of  $\text{CO}_2$ -age (Sugawara et al., 2025). We have added some sentences as follows:

Lines 563-564:

“, which was supported by more recent result of  $\text{CO}_2$ -age observation (Sugawara et al, 2025)”

Lines 581-584:

“We have also conducted simulations of enhanced-RMC scenario so that the mean age of air decreased by

0.15 years decade<sup>-1</sup> at an altitude of 35 km over the northern mid-latitudes. The resulting trends in  $\delta\Omega$  at the ground surface and mid-stratosphere were the opposite of those of the weakened-RMC scenario, but their magnitudes were almost the same. Similar results have been also shown in trends simulated for  $\delta(\text{Ar}/\text{N}_2)$  by Ishidoya et al. (2021).”

*Line 528-530: “significant influence on estimates of ocean heat content..”*

*Is there any way to get some first order constraints on this? For e.g., would it be possible to make a statement like “if stratospheric circulation changed by X%, we would expect it to have Y% impact on estimates on long term ocean heat content” or something along these lines? This seems like a very important constraint to have on this proxy. Noble gas thermometry for mean ocean temperatures from ice cores (for e.g.: <https://www.researchsquare.com/article/rs-5610580/v1>) seem to fundamentally assume no other processes are affecting it. If there is indeed an effect from circulation, it would be very important to know how large this effect could be, and how that translates to effects on MOT reconstructions.*

Thank you for your professional comments on OHC. This reminded us that this point is very important, and we have added the following new section 3.6 as “Implications for ocean heat content and noble gas thermometry of mean ocean temperature”. We discussed about the effects of OHC increase and BDC change on the elemental ratios of noble gases. It is only a rough estimate, but we have tried to describe it as quantitatively as possible. We have also added relevant references.

Lines 665-703:

“3.6 Implications for ocean heat content and noble gas thermometry of mean ocean temperature

Noble gases are extremely stable in the atmosphere, but they can be exchanged between the atmosphere and ocean because their solubilities in seawater change with seawater temperature variations. Because the temperature dependence of solubility is unique to each noble gas, the air-sea flux of noble gases due to changes in seawater temperature changes the elemental ratios of noble gases in the atmosphere (e.g. Keeling et al., 2004). Using this principle, the global mean ocean temperature (MOT) over the past several hundred thousand years has been reconstructed from  $\delta(\text{Kr}/\text{N}_2)$ ,  $\delta(\text{Xe}/\text{N}_2)$  and  $\delta(\text{Xe}/\text{Kr})$  of bubble air trapped in ice cores (e.g., Bereiter et al., 2018b; Shackleton et al., 2020; Haeberli et al., 2021). Ishidoya et al. (2021) reported the long-term variations of  $\delta(\text{Ar}/\text{N}_2)$  observed at ground stations in 2012 – 2020 and discussed the contributions of secular changes in global ocean heat content (OHC) and BDC. They concluded that the effect of the BDC change on  $\delta(\text{Ar}/\text{N}_2)$  at the ground surface cannot be ignored.

We extended the discussion of  $\delta(\text{Ar}/\text{N}_2)$  by Ishidoya et al. (2021) to  $\delta(\text{Kr}/\text{Ar})$ ,  $\delta(\text{Xe}/\text{Ar})$ , and  $\delta(\text{Ne}/\text{Ar})$ , and roughly estimated the decadal-scale effects of increased OHC on the elemental ratios of noble gases, comparing them with the effects associated with BDC variations discussed in Section 3.4. The rate of

change of N<sub>2</sub> and noble gases in response to an increase in OHC depends on seawater temperature, and the relative rates of change of N<sub>2</sub>, Ar, Kr, Xe, and Ne per 100 ZJ (Zeta = 10<sup>21</sup>) of OHC are reported in Table 1 of Keeling et al. (2004). Assuming a seawater temperature of 10°C, the rates of change for  $\delta(\text{Ar}/\text{N}_2)$ ,  $\delta(\text{Kr}/\text{Ar})$ ,  $\delta(\text{Xe}/\text{Ar})$ , and  $\delta(\text{Ne}/\text{Ar})$  are 2.56, 6.12, 19.42, and -3.91 per meg (100 ZJ)<sup>-1</sup>, respectively. The OHC value varies significantly depending on the depth of the ocean that is considered. Because we mainly focus on fluctuations over a relatively short timescale in this section, we used the annual OHC data reported by NOAA/NCEI up to a depth of 700 m (<https://www.ncei.noaa.gov/access/global-ocean-heat-content/index.html>, last access: September 18, 2025). Using this OHC data, the average rate of change in OHC over the 10-year period from 2010 to 2020 was calculated as 8.4 ZJ year<sup>-1</sup>. Therefore, the temporal change rates of  $\delta(\text{Ar}/\text{N}_2)$ ,  $\delta(\text{Kr}/\text{Ar})$ ,  $\delta(\text{Xe}/\text{Ar})$ , and  $\delta(\text{Ne}/\text{Ar})$  associated with the increase in OHC during this period were estimated to be 2.2, 5.1, 16.3, and -3.3 per meg decade<sup>-1</sup>, respectively. The rates of change in  $\delta_\Omega$  caused by the change in BDC described in Section 3.4 (increase rate in Table 3) were comparable to the rates of change caused by increases in OHC. The relative magnitudes of the change rates due to the BDC change to those due to the OHC increase are 66, 71, 41, and 78 % for  $\delta(\text{Ar}/\text{N}_2)$ ,  $\delta(\text{Kr}/\text{Ar})$ ,  $\delta(\text{Xe}/\text{Ar})$ , and  $\delta(\text{Ne}/\text{Ar})$ , respectively. This result suggests that OHC and BDC variations are essential for decadal-scale variations in the elemental ratios of noble gases.

It is interesting to determine how the BDC fluctuations can affect noble gases over the timescale of glacial-interglacial cycles. Fu et al. (2020) simulated BDC during the Last Glacial Maximum (LGM) using the Whole Atmosphere Community Climate Model (WACCM) and showed that the tropical upwelling during the LGM was weaker than that during the modern climate and that the mean age of air increased everywhere in the stratosphere during the LGM. We conducted an additional 2-D model simulation for a steady-state condition with a slow BDC in a simplified manner. The RMC in the model was weakened so that the mean age of air increased by 0.3 years (approximately 9 %) at an altitude of 35 km over the northern mid-latitudes when the model reached steady state after spin-up calculation during the 40-year period. As a result of this simulation, the changes in the annual average  $\delta(\text{Ar}/\text{N}_2)$ ,  $\delta(\text{Kr}/\text{Ar})$ ,  $\delta(\text{Xe}/\text{Ar})$ , and  $\delta(\text{Ne}/\text{Ar})$  at the ground surface in southern high latitudes were 2.7, 7.0, 12.8, and -4.9 per meg, respectively, compared with those before changing the RMC. If the BDC changes significantly with glacial-interglacial cycles, this may be recorded in the noble gas elemental ratios in ice core samples, which may need to be considered when the past MOT is reconstructed from noble gases.”

Accounting for these discussions, we added the following to the abstract:

Lines 29-30:

“However, it was suggested that changes in the stratospheric circulation during glacial and interglacial cycles may have affected the noble gas elemental ratios in ice core samples.”
